# Supplementary material for: Plasma proteome profiling in giant cell arteritis
Source: HighWire-hosted journal article supplement (doi:10.1136/ard-2024-225868), 2024-08-17
Supplement: ard-2024-225868supp002_data_supplement.pdf [file ard-2024-225868supp002_data_supplement.pdf]

**SUPPLEMENTAL INFORMATION**

for

Plasma Proteome Profiling in Giant Cell Arteritis

by

Cunningham and Hur *et al.*

**Plasma proteome data standardization**

Data standardization, comprised of normalization and calibration, was performed on the raw assay data to remove systematic biases after microarray feature aggregation. Normalization is a sample-by-sample adjustment to the overall signal within a single plate (run) performed across three non-consecutive steps: hybridization controls normalization, intraplate median signal normalization, and median signal normalization to a reference. Plate scaling and calibration were done through SOMAmer binding reagent-by-SOMAmer binding reagent adjustment to minimize between-plate variability. Global reference standards were established for procedures with controls on each plate. Individual samples, quality control (QC), and calibrator samples were normalized and calibrated to the established global reference standards. Separate calibrator global reference standards were established for each matrix, and assay shifts or skew from the global reference standards were tracked over time. In addition, SOMAmer reagents that represent control or non-human analytes were removed, resulting in 7,289 proteins for subsequent analyses. Of note, proteins having the same name but with multiple barcodes (i.e., SeqID) were considered as separate features. A total of 90 plasma samples were profiled using the SomaScan assay, and protein abundance RFUs were quantile normalized prior to all statistical analyses.

**Serum or plasma CRP reference ranges for the clinical sites involved in this study**

- Boston University: < 1.0 mg/dL
- Cleveland Clinic: < 0.9 mg/dL
- Mayo Clinic: < 5.0 mg/L
- Mount Sinai Hospital: < 10.0 mg/L
- St. Joseph's Healthcare Hamilton: < 10.0 mg/L
- University of Pennsylvania: < 0.8 mg/L (hsCRP < 7.5 mg/dL)

**Protein symbols and their designations listed in order of appearance in the main text**

| <b>Protein symbol</b> | <b>Designation</b>                                         |
|-----------------------|------------------------------------------------------------|
| IFN- $\gamma$         | Interferon gamma                                           |
| IL-2                  | Interleukin 2                                              |
| TNF- $\alpha$         | Tumor necrosis factor alpha                                |
| CCL25                 | C-C motif chemokine ligand 25                              |
| CD40                  | Tumor Necrosis Factor receptor Superfamily Member 5        |
| CXCL9                 | C-X-C motif chemokine ligand 9                             |
| IL10RB                | Interleukin 10 receptor subunit beta                       |
| MCP3                  | C-C motif chemokine ligand 7                               |
| SCF                   | Mast cell growth factor                                    |
| PRKRA                 | Protein activator of interferon induced protein            |
| VSIG4                 | V-set and immunoglobulin domain containing 4               |
| CGB3                  | Chorionic gonadotropin subunit beta 3                      |
| SHARPIN               | Shank-associated RH domain-interacting protein             |
| ABLIM3                | Actin binding LIM protein family member 3                  |
| RHOT1                 | Ras homolog family member T1                               |
| IL36A                 | Interleukin 36 alpha                                       |
| IBSP                  | Integrin binding sialoprotein                              |
| BCDIN3D               | RNA 5'-monophosphate methyltransferase                     |
| APOBEC3G              | Apolipoprotein B mRNA editing enzyme catalytic subunit 3G  |
| UROS                  | Uroporphyrinogen III synthase                              |
| FER                   | FER tyrosine kinase                                        |
| APOA4                 | Apolipoprotein A4                                          |
| BCAN                  | Brevican                                                   |
| P4HB                  | Prolyl 4-hydroxylase subunit beta                          |
| CCL11                 | C-C motif chemokine ligand 11                              |
| PLOD3                 | Procollagen-lysine,2-oxoglutarate 5-dioxygenase 3          |
| IMPA1                 | Inositol monophosphatase 1                                 |
| NRN1L                 | Neuritin 1 like                                            |
| TOM1                  | Target of myb1 membrane trafficking protein                |
| MMP12                 | Matrix metalloproteinase 12                                |
| UCHL1                 | Ubiquitin C-terminal hydrolase L1                          |
| TFRC                  | Transferrin receptor protein 1                             |
| PAPPA                 | Pappalysin 1                                               |
| BIRC7                 | Baculoviral IAP repeat containing 7                        |
| LONP1                 | Lon peptidase 1, mitochondrial                             |
| CXorf38               | Chromosome X open reading frame 38                         |
| YY2                   | Transcription Factor Yin Yang 2                            |
| NUMBL                 | NUMB like endocytic adaptor protein                        |
| HEPH                  | Hephaestin                                                 |
| RAD51D                | DNA repair protein RAD51 homolog 4                         |
| RPLP2                 | Ribosomal protein lateral stalk subunit P2                 |
| NGFR                  | Nerve growth factor receptor                               |
| UCMA                  | Upper zone of growth plate and cartilage matrix associated |
| CA6                   | Carbonic anhydrase 6                                       |
| KIR3DL1               | Killer cell immunoglobulin like receptor, three Ig         |
| PDGFC                 | Platelet derived growth factor C                           |

|        |                                              |
|--------|----------------------------------------------|
| PTP4A1 | Protein tyrosine phosphatase 4A1             |
| B2M    | Beta-2-microglobulin                         |
| C9     | Complement C9                                |
| CD8A   | T-cell surface glycoprotein CD8 alpha chain  |
| LBP    | Lipopolysaccharide binding protein           |
| IL5    | Interleukin 5                                |
| TRIL   | TLR4 interactor with leucine rich repeats    |
| C8G    | Complement C8 gamma chain                    |
| CCL14  | C-C motif chemokine ligand 14                |
| CFD    | Complement factor D                          |
| CD59   | Membrane attack complex inhibition factor    |
| IL1RL1 | Interleukin 1 receptor like 1                |
| PDCD1  | Programmed cell death 1                      |
| CCL3   | C-C motif chemokine ligand 3                 |
| CFB    | Complement factor B                          |
| CXCL3  | C-X-C motif chemokine 3                      |
| CCL23  | C-C motif chemokine 23                       |
| HLA-G  | Major histocompatibility complex, class I, G |
| IL18R1 | Interleukin 18 receptor 1                    |
| C1RL   | Complement C1r subcomponent like             |
| C1S    | Complement component 1, S subcomponent       |
| C2     | Complement C2                                |
| C4BPA  | Complement C4-B-Like                         |
| CR1    | Complement receptor type 1                   |
| CFI    | Complement factor I                          |
| CLU    | Clusterin                                    |
| CFHR1  | Complement factor H related 1                |
| CFHR5  | Complement factor H related 5                |
| C5     | Complement C5                                |
| C6     | Complement C6                                |
| MASP1  | Mannan-binding lectin serine protease 1      |
| C3     | Complement C3                                |
